# Supplementary material for: Relationship between Dietary Fatty Acid Intake with Nonalcoholic Fatty Liver Disease and Liver Fibrosis in People with HIV
Source: MDPI journal article supplement (doi:10.3390/nu13103462), 2021-09-29
Supplement: s1 [file s1]

## Supplementary Material

### Relationship between dietary FA intake with NAFLD and/or liver fibrosis in people with HIV mono-infection

**Supplementary Table S1.** Clinical and demographic characteristics of participants with HIV mono-infection and non-alcoholic fatty liver disease (NAFLD) [CAP  $\geq$  248 dB/m; n=152, prevalence= 37%] included in the analysis in INI/FIOCRUZ. Rio de Janeiro, Brazil

|                                                             |                                                         | NAFLD (n=152)   |
|-------------------------------------------------------------|---------------------------------------------------------|-----------------|
| <b>Social and demographic</b>                               |                                                         |                 |
| Female sex <sup>a</sup>                                     |                                                         | 87 (57.2)       |
| Age, years <sup>b</sup>                                     |                                                         | 50 (41 - 55)    |
| Self-reported skin color <sup>a</sup>                       |                                                         |                 |
|                                                             | White                                                   | 82 (53.9)       |
|                                                             | Brown                                                   | 42 (27.6)       |
|                                                             | Black                                                   | 27 (17.8)       |
|                                                             | Others                                                  | 1 (0.7)         |
| Education <sup>a</sup> <8 years of study                    |                                                         | 74 (48.7)       |
| <b>Biochemistry</b>                                         |                                                         |                 |
| ALT, IU/L <sup>b</sup>                                      |                                                         | 34 (25 - 50)    |
| AST, IU/L <sup>b</sup>                                      |                                                         | 25 (20 - 34)    |
| Alkaline phosphatase, IU/L <sup>b</sup>                     |                                                         | 87 (68 - 110)   |
| GGT, IU/L <sup>b</sup>                                      |                                                         | 51 (37 - 85)    |
| Total cholesterol, mg/dL <sup>b</sup>                       |                                                         | 196 (171 - 222) |
| LDL - cholesterol, mg/dL <sup>b</sup>                       |                                                         | 116 (91 - 142)  |
| HDL - cholesterol, mg/dL <sup>b</sup>                       |                                                         | 41 (33 - 50)    |
| Triglycerides, mg/dL <sup>b</sup>                           |                                                         | 165 (112 - 243) |
| Fasting glucose, mg/dL <sup>b</sup>                         |                                                         | 98 (89 - 106)   |
| Insulin, um/L                                               |                                                         | 15 (10 - 20)    |
| HOMA-IR                                                     |                                                         | 4 (2 - 5)       |
| <b>Nutritional Status</b>                                   |                                                         |                 |
| BMI(kg/m <sup>2</sup> ) <sup>b</sup>                        |                                                         | 29 (26 - 32)    |
| BMI(kg/m <sup>2</sup> ) <sup>a</sup>                        |                                                         |                 |
|                                                             | Lean [ $< 25$ Kg/m <sup>2</sup> ] <sup>a</sup>          | 27 (17.8)       |
|                                                             | Overweight [25 – 29,99 Kg/m <sup>2</sup> ] <sup>a</sup> | 65 (42.8)       |
|                                                             | Obesity [ $\geq 30$ Kg/m <sup>2</sup> ] <sup>a</sup>    | 60 (39.5)       |
| Body fat, (%) by bioimpedance <sup>b</sup>                  |                                                         | 32 (27 - 37)    |
| <b>Comorbidities</b>                                        |                                                         |                 |
| Diabetes mellitus <sup>a</sup>                              |                                                         | 34 (22.4)       |
| Hypertension <sup>a</sup>                                   |                                                         | 52 (34.2)       |
| Dyslipidaemia <sup>a</sup>                                  |                                                         | 44 (28.9)       |
| Metabolic syndrome <sup>a</sup>                             |                                                         | 87 (58.8)       |
| <b>HIV infection and ART</b>                                |                                                         |                 |
| Duration of HIV, years <sup>b</sup>                         |                                                         | 12 (7 - 19)     |
| CD4+ T-lymfocyte count (cells/m <sup>3</sup> ) <sup>b</sup> |                                                         | 708 (524 - 935) |
| Current ART use <sup>a</sup>                                |                                                         | 147 (96.7)      |

Duration of ART, years<sup>b</sup>

10 (4 - 16)

Data expressed as n (%) <sup>a</sup> or median (IQR) <sup>b</sup>. ALT, alanine transaminase; ART, antiretroviral therapy; AST, aspartate transaminase; BMI, body mass index; GGT, gamma-glutamyltransferase, high-density lipoprotein; HOMA-IR, homeostasis model assessment of insulin resistance; LDL, low-density lipoprotein; NAFLD, non-alcoholic fatty liver disease.

**Supplementary Table S2** Clinical and demographic characteristics of participants with HIV mono-infection and significant liver fibrosis (stage F≥2) [LSM ≥ 7.1 kPa or ≥ 6.2 kPa with M or XL probe; n=72, prevalence= 16%] included in the analysis in INI/FIOCRUZ. Rio de Janeiro, Brazil

|                                                                 |                                                         | Liver fibrosis n=72 |
|-----------------------------------------------------------------|---------------------------------------------------------|---------------------|
| <b>Social and demographic</b>                                   |                                                         |                     |
| Female sex <sup>a</sup>                                         |                                                         | 42 (58.3)           |
| Age, years <sup>b</sup>                                         |                                                         | 47 (41 - 54)        |
| Self-reported skin color <sup>a</sup>                           |                                                         |                     |
|                                                                 | White                                                   | 33 (45.8)           |
|                                                                 | Brown                                                   | 20 (27.8)           |
|                                                                 | Black                                                   | 18 (25)             |
|                                                                 | Outros                                                  | 1 (1.4)             |
| Education <sup>a</sup> <8 years of study                        |                                                         | 37 (51.4)           |
| <b>Biochemistry</b>                                             |                                                         |                     |
| ALT, IU/L <sup>b</sup>                                          |                                                         | 36 (25 - 56)        |
| AST, IU/L <sup>b</sup>                                          |                                                         | 29 (22 - 41)        |
| Alkaline phosphatase, IU/L <sup>b</sup>                         |                                                         | 86 (68 - 108)       |
| GGT, IU/L <sup>b</sup>                                          |                                                         | 54 (36 - 111)       |
| Total cholesterol, mg/dL <sup>b</sup>                           |                                                         | 176 (153 - 203)     |
| LDL - cholesterol, mg/dL <sup>b</sup>                           |                                                         | 102 (83 - 125)      |
| HDL - cholesterol, mg/dL <sup>b</sup>                           |                                                         | 42 (35 - 52)        |
| Triglycerides, mg/dL <sup>b</sup>                               |                                                         | 140 (80 - 187)      |
| Fasting glucose, mg/dL <sup>b</sup>                             |                                                         | 95 (90 - 103)       |
| Insulin, um/L                                                   |                                                         | 12 (7 - 20)         |
| Homa-IR                                                         |                                                         | 3 (2 - 5)           |
| <b>Nutritional Status</b>                                       |                                                         |                     |
| BMI(kg/m <sup>2</sup> ) <sup>b</sup>                            |                                                         | 29 (24 - 33)        |
| BMI(kg/m <sup>2</sup> ) <sup>a</sup>                            |                                                         |                     |
|                                                                 | Lean [< 25 Kg/m <sup>2</sup> ] <sup>a</sup>             | 25 (34.7)           |
|                                                                 | Overweight [25 – 29,99 Kg/m <sup>2</sup> ] <sup>a</sup> | 18 (25)             |
|                                                                 | Obesity [≥ 30 Kg/m <sup>2</sup> ] <sup>a</sup>          | 29 (40.3)           |
| Body fat, (%) by bioimpedance <sup>b</sup>                      |                                                         | 32 (24 - 38)        |
| waist circumference (cm)                                        |                                                         | 91 (82 - 104)       |
| <b>Comorbidities</b>                                            |                                                         |                     |
| Diabetes mellitus <sup>a</sup>                                  |                                                         | 16 (22.2)           |
| Hypertension <sup>a</sup>                                       |                                                         | 29 (40.3)           |
| Dyslipidaemia <sup>a</sup>                                      |                                                         | 17 (23.6)           |
| Metabolic syndrome <sup>a</sup>                                 |                                                         | 32 (45.1)           |
| <b>HIV infection and ART</b>                                    |                                                         |                     |
| Duration of HIV, years <sup>b</sup>                             |                                                         | 11 (4 - 16)         |
| CD4+ T-lymfocyte count (cells/m <sup>3</sup> ) <sup>b</sup>     |                                                         | 648 (361 - 842)     |
| CD4+ T-lymfocyte count (<200cells/m <sup>3</sup> ) <sup>a</sup> |                                                         | 5 (7.1)             |
| Current ART use <sup>a</sup>                                    |                                                         | 68 (94.4)           |
| Duration of ART, years <sup>b</sup>                             |                                                         | 10 (3 - 15)         |

Data expressed as n (%) <sup>a</sup> or median (IQR) <sup>b</sup>. ALT, alanine transaminase; ART, antiretroviral therapy; AST, aspartate transaminase; BMI, body mass index; GGT, gamma-glutamyltransferase, high-density lipoprotein; HOMA-IR, homeostasis model assessment of insulin resistance; LDL, low-density lipoprotein; NAFLD, non-alcoholic fatty liver disease.
